1

2

3

**Population genomic SNPs from epigenetic RADs: gaining genetic and  
epigenetic data from a single established next-generation sequencing  
approach**

5

6

7

8

Crotti, M.<sup>1</sup>, Adams, C.E<sup>1,2</sup> and Elmer, K.R.<sup>1</sup>

9

10

11 1. Institute of Biodiversity, Animal Health & Comparative Medicine, College of Medical, Veterinary  
12 & Life Sciences, University of Glasgow, Glasgow, G12 8QQ, UK

13 2. University of Glasgow, Scottish Centre for Ecology and the Natural Environment, Rowardennan,  
14 G63 0AW, UK

15

16 Corresponding author: Kathryn R. Elmer, [Kathryn.Elmer@glasgow.ac.uk](mailto:Kathryn.Elmer@glasgow.ac.uk)

17

18 Running title: Population genetic SNPs from EpiRAD

19

20 Word count: 6,991

## 21 Summary

22 1. Epigenetics is increasingly recognised as an important molecular mechanism underlying  
23 phenotypic variation. To study DNA methylation in ecological and evolutionary contexts, epiRADseq  
24 is a cost-effective next-generation sequencing technique based on reduced representation sequencing  
25 of genomic regions surrounding non-/methylated sites. EpiRADseq for genome-wide methylation  
26 abundance and ddRADseq for genome-wide SNP genotyping follow very similar library and  
27 sequencing protocols, but to date these two types of dataset have been handled separately. Here we  
28 test the performance of using epiRADseq data to generate SNPs for population genomic analyses.

29

30 2. We tested the robustness of using epiRADseq data for population genomics with two independent  
31 datasets: a newly generated single-end dataset for the European whitefish *Coregonus lavaretus*, and a  
32 re-analysis of publicly available, previously published paired-end data on corals. Using standard  
33 bioinformatic pipelines with a reference genome and without (i.e. *de novo* catalogue loci), we  
34 compared the number of SNPs retained, population genetic summary statistics, and population genetic  
35 structure between data drawn from ddRADseq and epiRADseq library preparations.

36

37 3. We find that SNPs drawn from epiRADseq are similar in number to those drawn from ddRADseq,  
38 with a 55-83% of SNPs being identified by both methods. Genotyping error rate was <5% in both  
39 approaches. For summary statistics such as heterozygosity and nucleotide diversity, there is a strong  
40 correlation between methods (Spearman's  $\rho > 0.88$ ). Furthermore, identical patterns of population  
41 genetic structure were recovered using SNPs from epiRADseq and ddRADseq approaches.

42

43 4. We show that SNPs obtained from epiRADseq are highly similar to those from ddRADseq and are  
44 equivalent for estimating genetic diversity and population structure. This finding is particularly  
45 relevant to researchers interested in genetics and epigenetics on the same individuals because using a  
46 single epigenomic approach to generate two datasets greatly reduces the time and financial costs  
47 compared to using these techniques separately. It also efficiently enables correction of epigenetic

48 estimates with population genetic data. Many studies will benefit from a combinatorial approach with  
49 genetic and epigenetic markers and this demonstrates a single, efficient method to do so.

50

51 Keywords: DNA methylation, epigenetics, RADseq, population genetics, single nucleotide  
52 polymorphism, genomics, molecular ecology

53

## 54 **Introduction**

55

56 The advent of Next Generation Sequencing (NGS) has facilitated a revolution in ecology and  
57 evolution by enabling the integration of the two fields to better elucidate molecular patterns and  
58 mechanisms (Ekblom & Galindo, 2011). Technologically, an advance of NGS is not just reduced, per  
59 base pair costs of sequencing but that genomic techniques can be applied to so-called ‘non-model’  
60 species or those without reference genomes or other genomic resources (Ekblom & Galindo, 2011).  
61 Among the many NGS techniques recently developed, genotyping by sequencing approaches, such as  
62 restriction site associated DNA sequencing (RADseq), have stood out for their versatility, low cost,  
63 and the amount of data generated (Davey et al. 2013; Andrews et al. 2016; Rowe, Renault, &  
64 Guggisberg, 2016). Briefly, one or more restriction enzymes are used to digest the genome and only  
65 fragments in a specified range are retained for sequencing, resulting in genotypes from a  
66 representative portion of the genome for a variable number of individuals (Andrews et al. 2016).  
67 Double digest RADseq, or ddRADseq (Peterson et al. 2012), is one of the many varieties of  
68 genotyping by sequencing methods available and is particularly powerful because it allows a high  
69 degree of customisation in terms of the number of loci obtained and coverage per individual, and can  
70 be modified for different sequencing platforms (Puritz et al. 2014; Recknagel et al. 2016). ddRADseq  
71 is now an established tool for genotyping with NGS, to investigate many topics in ecology and  
72 evolution including population genetics, genetic mapping, parentage inference, genomics of  
73 adaptation, and phylogenomics using single nucleotide polymorphisms (SNPs) (Davey & Blaxter,  
74 2010; Andrews et al. 2016). SNPs focus on genetic mutations, but it is well recognised that other  
75 molecular processes in the genome such as gene regulation and methylation influence biodiversity.

76 The study of epigenetic processes, which cause change in gene expression without nucleotide  
77 mutation of the underlying genome sequence, is providing a new complexity in the genotype –  
78 phenotype map and in some cases a disconnect of genotype and phenotype (Feil & Fraga, 2012). The  
79 best understood epigenetic mechanism is DNA methylation, which involves the addition of a methyl  
80 group to cytosine, and in eukaryotes it occurs mainly in CpG dinucleotides (Metzger & Schulte,

81 2016). Relevant for ecology and evolution, the field of ecological epigenetics aims to understand how  
82 DNA methylation associates with patterns of population variation and influences phenotypic  
83 diversity, local adaptation, and plasticity in natural populations (Bossdorf, Richards, & Pigliucci,  
84 2008; Hu & Barrett, 2017). Until recently, epigenetic research in wild populations was conducted  
85 mainly using methylation-sensitive AFLPs (MS-AFLP) (e.g. Foust et al. 2016; Herrera et al. 2016),  
86 since they are cost-effective, easily applied to non-model organisms, and not computationally  
87 demanding (Schrey et al. 2013). However, they have several shortcomings (see review by Schrey et  
88 al. (2013)), the greatest of which is that they screen anonymous loci that then cannot be genome  
89 referenced nor compared across studies. Recently, the field has been invigorated by new methods that  
90 take advantage of NGS technology. One example is bisulfite sequencing, which comes in a number of  
91 variations (whole genome, reduced representation, target sequencing of specific gene regions) and has  
92 been shown to provide high resolution of the methylation landscape within genomes (Metzger &  
93 Schulte, 2016). However, this technique is expensive, can result in excessive DNA degradation, and  
94 requires a related reference genome for the species of interest, something that is still lacking for most  
95 non-model organisms (Leontiou et al. 2015; Metzger & Schulte, 2016).

96 EpiRADseq is a recently developed, reduced representation approach (Schield et al. 2016) to  
97 study DNA methylation variation in individuals. It is based on the established ddRADseq protocol  
98 (Peterson et al. 2012) and involves the digestion of the genome using two restriction enzymes, with  
99 one enzyme being methylation-sensitive. Therefore, a methylated locus will not be cut by the  
100 methylation-sensitive enzyme, will not be enriched by PCR nor sequenced, and thus no sequencing  
101 read is obtained in the data. If a locus is unmethylated, it will be cut in the same way as ddRADseq  
102 and therefore enriched by PCR and sequenced. Therefore, the number of overall reads for a locus is  
103 proportional to the level of (non-)methylation and differences in the methylation level between groups  
104 can be determined by the differences in number of reads per locus per sample (Schield et al. 2016).  
105 The advantages of this technique resemble those of all genomic reduced representation approaches  
106 such as RADseq: the possibility of sampling genome wide, no requirement for a reference genome,  
107 and the ability to map loci against a reference genome (if available) to determine to which genomic  
108 region they correspond (Andrews et al. 2016; Schield et al. 2016).

109 Combining genetic and epigenetic analyses in the same study is to date underleveraged but  
110 particularly valuable for providing insight into the relationship between genetic and epigenetic  
111 variation and downstream effects of interest, such as phenotypic diversity (Hu & Barrett, 2017). For  
112 example, DNA methylation can explain phenotypic variation better than genetics (e.g. Richards,  
113 Schrey & Pigliucci, 2012), methylation pattern can be explained by genetic effects rather than by  
114 other variables of interest (Robertson et al. 2017), and population-level methylation analyses can  
115 provide insight to mechanisms of evolution (Gugger et al. 2016). To infer methylation and genomic  
116 polymorphism (SNPs) using separate NGS techniques for the same set of individuals is expensive,  
117 inefficient, and time consuming but is the approach that has been used to date (e.g. Dimond,  
118 Gamblewood, & Roberts, 2017). A combined molecular approach that allows for DNA methylation  
119 and genetic analyses would increase the efficiency of such approaches and increase the scope of  
120 possible research questions in this area and be of considerable value to this field of study.

121 Because epiRADseq is similar in molecular methodology to ddRADseq, in this study we  
122 test whether the SNPs recovered by epiRADseq can also be used for population genomics. If SNPs  
123 for population genetics can be reliably extracted from epiRADseq data then epigenetic and population  
124 genomic analyses can be conducted efficiently on the same samples using the same molecular  
125 technique, from DNA extraction through to library preparation and sequencing. We tested this using  
126 two independent examples from natural animal populations for which epiRADseq and ddRADseq  
127 data are available from the same individuals: a previously published dataset (Dimond et al. 2017)  
128 from a marine invertebrate, the corals of the genus *Porites* (genome size between 420 Mb and 1.14  
129 Gb) for which there is currently no reference genome; and a newly generated dataset from a  
130 vertebrate, the freshwater European whitefish *Coregonus lavaretus* (genome size 3.3 Gb) for which  
131 genome scaffolds are available. We ran analyses in parallel on epiRADseq and ddRADseq data to  
132 compare number of SNPs retained, summary statistics, and inferred population genetic structure. We  
133 conclude that epiRADseq data are appropriate for population genomics and suggest a bioinformatic  
134 pipeline for extracting SNPs.

135

## 136 **Material and Methods**

### 137 **2.1 Coral data source**

138 EpiRADseq was recently used in conjunction with ddRADseq by Dimond et al. (2017) to assess the  
139 population genetics and epigenetics of three morphospecies of coral *Porites spp.* from the Caribbean.  
140 EpiRADseq was used for differential methylation analysis and ddRADseq was used to estimate  
141 population structure between samples and to correct for the bias of epiRADseq in the methylation  
142 analysis, as a missing locus could either mean a lack of site due to mutation (a genetic factor) or due  
143 to methylation (an epigenetic factor) (Schield et al. 2016). They excluded from the dataset all  
144 epiRADseq loci that were missing in the ddRADseq dataset. However, they did not test the possibility  
145 of using epiRADseq to call SNPs for genetic analysis.

146

### 147 **2.2 Coral data processing**

148 The raw reads for ddRADseq and epiRADseq from Dimond et al. (2017) were downloaded from their  
149 repository ([http://owl.fish.washington.edu/nightingales/Porites\\_spp/](http://owl.fish.washington.edu/nightingales/Porites_spp/)). The coral data comprised 48  
150 individuals prepared with both ddRADseq and epiRADseq methods, for a total of 96 samples split  
151 into 12 libraries, of which we focused on the 60 samples (30 ddRADseq and 30 epiRADseq) that were  
152 analysed in the Dimond et al. (2017) study.

153 The first 5 and 3 bp were trimmed with *Trimmomatic* from the forward and reverse reads to  
154 remove the enzyme cut site. Then, paired-end trimming was done with following settings: LEADING  
155 = 20, TRAILING = 20, MINLEN = 85. Reads were mapped against the genome of the coral symbiont  
156 *Symbiodinium minutum*, provided in the Supplementary information of Dimond et al. (2017), to  
157 remove symbiont reads from the *de novo* assembly, as was done by Dimond et al. (2017), using *bwa*  
158 *mem* (Li & Durbin, 2009). The retained coral reads were used for all further analyses.

159 A pseudo-reference genome of coral samples was created so that we could determine the  
160 number of common SNPs found in both the ddRADseq and epiRADseq datasets. This pseudo-  
161 genome was assembled using *Rainbow* v.2.0.4 (Chong et al. 2012) with the cluster, divide, and merge  
162 functions with default parameters using the fastq files free of symbiont reads. *CD-Hit* v.4.7 (Fu et al.

163 2012) was then used with the *cd-hit-est* (at a 90% identity threshold) function for further filtering.  
164 ddRADseq and epiRADseq reads were mapped against this pseudo-genome using *bwa mem* with  
165 default settings and retained if mapping quality was >20.

166 If a sample had fewer than 200,000 reads in either the ddRADseq or epiRADseq dataset, it  
167 was removed from both so that the datasets had the same individuals. This excluded four samples and  
168 thus 52 samples (26 for ddRADseq and 26 for epiRADseq) were retained for analysis. The  
169 *ref\_map.pl* v.2.1 pipeline in Stacks (Catchen et al. 2013) was run for both ddRADseq and epiRADseq  
170 using default parameters. All the samples were considered as part of the same population for the  
171 Stacks pipeline. The dataset was then filtered with the following parameters from the *populations*  
172 program: *-r = 1* (no missing data allowed, same as in Dimond et al. (2017)), *--min\_maf = 0.10* and *--*  
173 *max\_obs\_het = 0.6, --write\_single\_snp*.

174

### 175 **2.3 Whitefish data generation**

176 Using existing tissue samples of *Coregonus lavaretus* from four Scottish loch populations preserved  
177 in ethanol (Crotti, Adams & Elmer, unpubl), DNA was extracted from fish fin clips for the ddRADseq  
178 and muscle tissue for the epiRADseq libraries using the NucleoSpin Tissue kit (Macherey-Nagel)  
179 following the manufacturers recommendations. The protocol used for the ddRADseq library  
180 preparation follows Jacobs et al. (2018). Briefly, 1 µg of genomic DNA per sample was double  
181 digested using the rare cutting enzyme *PstI*-HF (CATCAG recognition site) and the common cutting  
182 enzyme *MspI* (CCGG recognition site). Combinatorial barcoded Illumina adapters were then ligated  
183 to *PstI*-HF and *MspI* overhangs. Samples were size selected using a Pippin Prep (Sage Science) at a  
184 target range of 150-300 bp fragments. To enrich for the selected loci, we performed PCR  
185 amplification cycles with the following settings: 30 s at 98 °C, 9X (10 s 98 °C, 30 s 65 °C, 30 s 72  
186 °C), 5 min 72 °C. After PCR purification, the library was run on a 1.25% agarose gel stained with  
187 SYBR Safe (Life Technologies) to remove any adapter dimers and/or fragments outside the selected  
188 size range. DNA was excised manually, cleaned and quantified using the Qubit Fluorometer with the  
189 dsDNA BR Assay (Life Technologies) to ensure the final library concentration of >1 ng/µL.



190 The protocol for the epiRADseq library was identical to the ddRADseq, except a methylation  
191 sensitive *HpaII* (CCGG recognition site; therefore, compatible with the same combinatorial barcodes  
192 and adapters) was used instead of the *MspI* restriction enzyme.

193 The ddRADseq and epiRADseq libraries consisted of the same 43 samples each, including  
194 two technical replicates to estimate sequencing error (Mastretta-Yanes et al. 2015), and were  
195 sequenced on a single lane to 4 million reads per individual. NGS sequencing was carried out at  
196 Glasgow Polyomics facility on the Illumina NextSeq 500 platform with 75 bp paired end reads.

197

#### 198 **2.4 Whitefish data processing**

199 EpiRADseq and ddRADseq data were analysed separately using the same approaches. Samples with  
200 fewer than 350 K reads in one dataset were excluded from both datasets. The filtering steps applied to  
201 the whitefish data were similar as used in the coral data, but with some modifications because the  
202 whitefish data were analysed as single end. First, raw reads were demultiplexed with *process\_radtags*  
203 in Stacks v.2.1 (Catchen et al. 2013) and only forward reads were retained. *Trimmomatic* (Bolger et  
204 al. 2014) was used to trim reads with following settings: HEADCROP = 5 (to remove enzyme cutting  
205 site), LEADING = 20, TRAILING = 20, MINLEN = 60. Reads were then mapped to an unpublished  
206 draft genome of the lake whitefish *Coregonus clupeaformis* (L. Bernatchez, pers comm) using *bwa*  
207 *mem* v.0.7.17 with default settings and retained if mapping quality was > 20 with *samtools* v.1.7 (Li et  
208 al. 2009). In Stacks, the *ref\_map.pl* script was used to assemble reads into stacks and call loci, and the  
209 *population* module was used to call SNPs.

210 To assess the sensitivity of SNP calling to missing data for epiRADseq data, we created three  
211 different datasets for both the ddRADseq and epiRADseq reads, which varied according to the  
212 proportion of individuals per population the locus had to be in to be retained (*-r* parameter): 0.667,  
213 0.75, or 1. The other filtering parameters were kept constant: *-p* = 2, *--max\_obs\_het* = 0.6, *--min\_maf*  
214 = 0.10, *--write\_single\_snp*. The three datasets are hereafter referred to as the *-r* 67, *-r* 75, and *-r* 100  
215 datasets. This assessment was done only for the whitefish data, as with the coral data we focused on  
216 comparing our results to the original paper (Dimond et al. 2017).

217 We tested the effect of allele dropout (ADO) on genetic estimates derived from epiRADseq  
218 data, because methylated loci are not sequenced (Schield et al. 2016). To do so we estimated genetic  
219 diversity for each individual for both ddRADseq and epiRADseq data in *Stacks* with following  
220 parameters:  $-p\ 23$  (each individual was considered a population),  $--max\_obs\_het = 0.6$ ,  $--min\_maf =$   
221  $0.10$ . We then compared these estimates using a paired Wilcoxon signed rank test.

222

## 223 **2.5 Whitefish and coral data analysis**

224 For both the whitefish and coral data we recorded the total number of SNPs retained by ddRADseq  
225 and epiRADseq datasets. Summary statistics of genetic diversity (expected heterozygosity, observed  
226 heterozygosity, and nucleotide diversity) per locus calculated by the *population* module of *Stacks* for  
227 the ddRADseq and epiRADseq datasets were compared using Spearman correlation in the R  
228 environment (R Core Team, 2018).

229 To compare estimates of population structure between the ddRADseq and epiRADseq  
230 datasets, we used the R package *adegenet* v.2.1.1 (Jombart, 2008) to run a Discriminant Analysis of  
231 Principal Components (DAPC) (Jombart et al. 2010), which uses *k*-means clustering and the Bayesian  
232 information criterion to identify the most likely number of genetic clusters in the dataset. The  
233 *xvalDAPC* function was used to determine the number of PCs to be retained by the DAPC analysis.  
234 The divergence estimate between the inferred clusters was calculated using Weir and Cockerham *F*<sub>st</sub>  
235 (Weir & Cockerham, 1984) implemented in the R package *hierfstat* v.0.04 (Goudet, 2005). For the  
236 coral analysis we additionally ran the DAPC on the set of SNPs used by Dimond et al. (2017), which  
237 they made available in the supplementary information of their article, to compare our results to the  
238 original study.

239

## 240 **2.6 Genotyping error rate**

241 To estimate genotyping error rate for the whitefish data we used two approaches: 1) we computed a  
242 matrix of genetic distances between individuals using the function *dist.gene* in the R package *ape*  
243 v.5.2 (Paradis & Schiepl, 2018), following Dimond et al. (2017); 2) we used the R script published by

244 Mastretta-Yanes et al. (2015), where the number of SNP mismatches is counted and calculated as the  
245 ratio over all compared loci (Recknagel et al. 2015). Replicated samples were compared at six-fold  
246 coverage. Technical replicates were not included in the coral dataset so genotyping error was not  
247 quantified.

248

249

## 250 **Results**

251

### 252 **3.1 Coral data filtering**

253 The 30 ddRADseq samples had a total of 213 M raw reads and the 30 epiRADseq samples a total of  
254 156 M raw reads (Table 1). After filtering with *Trimmomatic*, the ddRADseq samples retained 205 M  
255 reads, and the epiRADseq samples retained 149 M reads. Mapping against the pseudo-genome  
256 created from the ddRADseqs reads (418,401 contigs), retained 142 M reads for the ddRADseq and  
257 102 M reads for the epiRADseq samples.

258 The *Stacks* pipeline generated a catalogue of 285,987 loci for the ddRADseq dataset, with a  
259 mean effective per sample coverage of 64.9x, and 164,411 loci for the epiRADseq dataset, with an  
260 effective per sample mean coverage of 75.7x. The average number of loci per individual was 58,896  
261 for the ddRADseq and 33,843 for the epiRADseq catalogues.

262

### 263 **3.2 Coral data analyses**

264 The *population* filtering generated datasets of 1,046 SNPs and 819 SNPs for ddRADseq and  
265 epiRADseq respectively (Fig. 1a). The number of SNPs retained in our study is slightly lower to those  
266 used by the original study (1,113 SNPs from ddRADseq, also assessed here). By mapping reads to a  
267 reference assembly, we could calculate the number of SNPs that overlapped between the two datasets.  
268 In total 676 SNPs overlapped, which corresponds to 83% of SNPs in the epiRADseq and 65% of  
269 SNPs in the ddRADseq datasets.

270 DAPC analyses of the epiRADseq and ddRADseq datasets recovered the same three clusters  
271 as were inferred from the original study from Dimond et al. using ddRADseq (Fig. 2). Our  $F_{st}$   
272 estimates between clusters ranged from 0.24 to 0.26, while the estimates of Dimond et al. were 0.19 to  
273 0.21 (Fig 2a,b,c). The proportion of variation explained by the discriminant functions was similar in  
274 all three datasets (Fig. 2). When comparing estimates of genetic diversity, we recovered strong  
275 Spearman's  $\sigma$  correlation for all three summary statistics between the ddRADseq and the epiRADseq  
276 datasets (Fig. 3).

277

### 278 **3.3 Whitefish sequencing results and data filtering**

279 The whitefish ddRADseq library generated a total of 524 M reads and the epiRADseq library  
280 generated 554 M reads (Table 1). After demultiplexing with *process\_radtags* and filtering with  
281 *Trimmomatic*, the ddRADseq library retained 118 M reads, while the epiRADseq library retained 227  
282 M reads. After mapping to the reference genome, the ddRADseq library retained 40 M reads, while  
283 the epiRADseq library retained 120 M reads (Table 1). Excluding the samples with fewer than 350 K  
284 reads left a total of 23 samples plus two technical replicates in the epiRADseqs dataset and 23  
285 samples plus two technical replicates in the ddRADseq dataset.

286 The *Stacks* pipeline produced a catalogue of 355,491 loci for the ddRADseq library, with a  
287 mean effective per sample coverage of 12.7x, and of 321,324 loci for the epiRADseq library, with a  
288 mean effective per sample coverage of 36x. The average number of loci per individual was 108,127  
289 and 110,614 for the ddRADseq and epiRADseq respectively.

290

291

### 292 **3.4 Genotyping error rate**

293 The SNP genotyping error rate in the whitefish dataset was lower for epiRADseq for both analysis  
294 approaches. The *dist.gene* approach recovered a mean error rate of 6% ( $\pm$  standard deviation 0.6%)  
295 for the ddRADseq, and of 3% ( $\pm$  0.5%) for the epiRADseq, while the Mastretta-Yanes et al. approach  
296 estimated a mean error of 5% ( $\pm$  0.3%) for the ddRADseq and of 3% ( $\pm$  0.4%) for the epiRADseq.

297

### 298 **3.5 Whitefish data analysis**

299 The number of SNPs retained was very similar for those generated with the epiRADseq method and  
300 the ddRADseq method and decreased with increasing filtering stringency (Fig. 1); for the epiRADseq  
301 generated data we recovered 6971, 6686, and 5546 SNPs in the *-r* 67, *-r* 75, and *-r* 100 datasets  
302 respectively, while for the ddRADseq generated data we recovered 7289, 6988, and 5277 SNPs in the  
303 three datasets respectively. A total of 4518 SNPs were shared between the two *-r* 67 datasets, 4294  
304 SNPs were shared between the two *-r* 75 datasets, and 2978 SNPs were shared between the *-r* 100  
305 datasets.

306 The estimates of heterozygosity and nucleotide diversity inferred from ddRADseq and  
307 epiRADseq derived SNPs were highly correlated, with Spearman's correlations of 88.5 to 92.8%  
308 (Table 2). When looking at the genetic diversity estimates per individual, which would be impacted  
309 by allele dropout, we observed no reduction in expected heterozygosity ( $V = 58$ , p-value = 0.45) or  
310 nucleotide diversity ( $V = 82$ , p-value = 0.31) for the epiRADseq data.

311 The results of the population genetic structure analysis with DAPC were consistent across  
312 filtering stringencies and datasets (Fig. 4), with the four populations being grouped into two genetic  
313 clusters separating on axis 1 (and so displayed on one axis of variation instead of the two shown for  
314 the corals).  $F_{st}$  divergence between the two clusters was identical between methods for the *-r* 67 and -  
315 *r* 75 datasets at  $F_{st} = 0.23$ , and it was negligibly higher for the ddRADseq in the *-r* 100 datasets at  
316 0.24 and 0.25 (Fig. 4).

317

## 318 **Discussion**

319 Here we used two independent natural animal population datasets to show that epiRADseq data can  
320 be used to derive SNPs for population genomic analyses. We compared SNP number, estimates of  
321 summary statistics, and inference of population structure between ddRADseq and epiRADseq  
322 methods in a newly generated dataset of European whitefish and a previously published dataset on

323 corals. Overall, we find strong agreement for all of the above metrics between epiRADseq and  
324 ddRADseq protocols, meaning that epiRADseq data give equivalent results to the well-established  
325 method of ddRADseq-derived SNPs. The implication is that a single dataset can be used for  
326 epigenetic analyses and for inference of population structure. This is not only efficient but also  
327 valuable studies on the association between epigenetic and genetic diversity and their impact on  
328 phenotype.

329 Here we used previously published data and new data when comparing the epiRADseq and  
330 ddRADseq generated SNPs, which allows us to demonstrate the robustness of the molecular methods  
331 and of the bioinformatics pipelines independently. The coral dataset was drawn from Dimond et al.  
332 (2017), where they investigated population structure between three morphospecies of coral with  
333 ddRADseq and looked at the relationship between DNA methylation and environmental factors. The  
334 number of SNPs in our datasets is slightly lower than those used in the Dimond et al. (2017) study; we  
335 recovered 1,046 SNPs for ddRADseq and 819 SNPs for epiRADseq while they previous study  
336 retained 1,113 SNPs from ddRADseq. This is likely because different bioinformatic pipelines applied  
337 as they used *Pyrad* (Eaton, 2014) while we used *Stacks* (Catchen et al. 2013).

338 Our genetic diversity, differentiation, and population structure results of the coral data,  
339 derived from SNPs from their epiRADseq data, are consistent with those obtained by Dimond et al.  
340 (2017). The  $F_{st}$  estimates between the three population genetic clusters are slightly higher in our study  
341 (approximately 20% in excess of the previously published values). This is likely caused by the  
342 different loci being retained by the *Stacks* vs *Pyrad* pipelines, consistent with Pante et al. (2015)  
343 reporting a locus overlap of less than 50% between methods. However,  $F_{st}$  results are rarely strictly  
344 comparable across studies and instead are relative to the markers used (Hartl & Clark, 2007) and  
345 therefore these deviations can be considered irrelevant. These explorations and comparisons of our  
346 pipeline on the coral dataset demonstrate the appropriateness of the pipelines we applied and that the  
347 baseline genetic information is comparable across studies.

348 For the coral dataset, the number of loci in the ddRADseq catalogue was 43% higher than in  
349 the epiRADseq catalogue (285,987 vs 164,411) and resulted in a higher number of SNPs in the final  
350 ddRADseq dataset. This is expected due to the loci sampling bias of epiRADseq, as loci that are

351 methylated are not sequenced (Schield et al. 2016). However, we show that there is negligible effect  
352 on the resulting summary and differentiation statistics and the epiRADseq SNPs are therefore  
353 equivalent to the ddRADseq SNPs.

354 We explored the effect of different filtering levels on the SNP retention of epiRADseq and  
355 ddRADseq derived SNPs from the whitefish data. We did not explore this with the coral data as we  
356 were more interested in comparing estimates of population structure between epiRADseq and the  
357 previously published estimates derived from ddRADseq. As expected, the  $-r$  67 and  $-r$  75 ddRADseq  
358 datasets had more SNPs than the respective epiRADseq datasets, but the epiRADseq  $-r$  100 dataset  
359 had more SNPs than the ddRADseq  $-r$  100 dataset. This is probably due to the higher coverage of the  
360 epiRADseq reads (85 M reads for 25 individuals in the epiRADseq vs 32 M reads for 25 individuals  
361 in the ddRADseq), which resulted in more SNPs being retained in the most stringently filtered  
362 dataset.

363 We find an agreement between ddRADseq and epiRADseq analyses of population structure  
364 in the whitefish data, as both methods recover two clusters in our dataset of four sampled and closely  
365 related populations. The  $-r$  filtering had some impact on the correlation of the summary statistics  
366 between ddRADseq and epiRADseq, with the correlation increasing from as low as 88% up to 92% as  
367 the filtering became more stringent. This is expected because of the  $-r$  parameter in *Stacks*, which  
368 influences the number of individuals in a population a locus must be present to be retained in the  
369 dataset. In the  $-r$  67 and  $-r$  75 datasets, it is not required for the locus to be present in the same set of  
370 individuals (i.e. in two-thirds or three-quarters of all individuals in a population, respectively), while  
371 in the  $-r$  100 datasets this restriction is complete so all retained SNPs have to be shared across all  
372 individuals. We did not explore further filtering in our analyses, but previous work (e.g. Paris,  
373 Stevens, & Catchen, 2017; O'Leary et al. 2018; Linck & Battey, 2019) highlights the importance of  
374 fine-tuning the SNP-calling pipeline to suit the researcher's needs and the specificity of each dataset.  
375 However, with regard to the use of SNPs from epiRADseq it is important to consider that  
376 comparability across different datasets is not what matters; here that is done to evidence the method.  
377 Instead each of these stringencies and datasets would be valid. Overall, these results suggest that  
378 allowing some missing data (i.e.  $-r$  of 67% or 75%) will not bias genetic analyses conducted with

379 SNPs from epiRADseq data, consistent with what has already been shown previously with ddRADseq  
380 (Shafer et al. 2017).

381 We tested whether allele drop out (ADO) due to locus methylation (Schield et al., 2016) had  
382 an effect when using epiRADseq derived SNPs for genetic analyses. It has been shown through  
383 simulations (Gautier et al. 2013) and observed in empirical studies (Luca et al. 2011) that ADO leads  
384 to an underestimation of expected heterozygosity and nucleotide diversity. This could be a concern  
385 for epiRADseq derived SNPs because, by design, a methylated locus is not cut with epiRADseq and  
386 therefore will be absent from the dataset. However, we found no difference between ddRADseq and  
387 epiRADseq genetic diversity estimates per individual, suggesting ADO is not a particular concern in  
388 epiRADseq data.

389 Genotyping error in NGS techniques is due to several factors, including sequencing errors,  
390 assembly errors and missing data and will be influenced by coverage (Mastretta-Yanes et al. 2015).  
391 Using technical replicates is a way to estimate this error, which can then be moderated by fine-tuning  
392 the bioinformatic pipeline. We find that the SNP genotyping error rate is low and very similar  
393 between ddRADseq and epiRADseq libraries, ranging between 3 and 6% according to the calculation  
394 method used. Mastretta-Yanes et al. (2015) found SNP error rates between 2.4 and 5.8% using the  
395 *Stacks* pipeline on Illumina-based RAD sequencing. Recknagel et al. (2015), using a similar lab  
396 protocol to that used for the whitefish libraries here but sequenced on an Ion Proton platform,  
397 recovered genotyping errors of 1.8-2.2%. Dimond et al. (2017) used the ddRADseq and epiRADseq  
398 samples as technical replicates, as they were sequenced on the same lanes, and recovered a mean  
399 genotyping error rate of 3.6% (standard deviation 3.1%). Therefore, genotyping error rates in the  
400 whitefish libraries are consistent with those found by previous studies and are very similar between  
401 the ddRADseq and epiRADseq approaches.

402 When looking at the results of the coral and whitefish data together, we find agreement when  
403 estimating population structure either with ddRADseq or with epiRADseq. However, the percentage  
404 of SNPs shared between ddRADseq and epiRADseq was higher in the coral data (83% vs 55-65%).  
405 This could be due to the difference in genome complexity and genome size of the two organisms  
406 studied. Salmonids have undergone an extra whole genome duplication compared to other teleosts



407 (Macqueen & Johnston, 2014) and members of the genus *Coregonus* have an estimated genome size  
408 of 3.3 Gb (Gregory, 2018). Members of the coral order Scleractinia, to which the coral genus *Porites*  
409 *spp.* belong, have genomes ranging from 420 Mb to 1.14 Gb (Gregory, 2018). Smaller genomes  
410 generate fewer RAD loci, which are then more likely to be found across sequencing libraries at a  
411 given coverage (see Recknagel et al. 2015 for detailed quantifications). Furthermore, DNA  
412 methylation levels and patterns differ between the organisms studied here and may have an impact.  
413 Most of the CpG sites (~80%) in vertebrate genomes are methylated, with the unmethylated sites  
414 forming regions known as CpG islands, which are usually located near gene promoters (Metzger &  
415 Schulte, 2016). In contrast, most of the methylation in invertebrates occurs specifically in CpG sites  
416 within gene bodies (Dixon, Bay, & Matz, 2014). The methylation level of CpG sites in the  
417 scleractinian coral *Stylophora pistillata* is around 7% (Liew et al. 2018), a stark contrast to the  
418 methylation level of vertebrates. Differences in methylation between organisms might influence the  
419 number of fragments that are cut during digestion with *HpaII* and therefore affect the number of loci  
420 sequenced. We did not explore the genomic location of the SNPs used here, but with appropriate  
421 reference genome annotation information that is possible and would be very informative.

422 In addition to EpiRADseq (Schield et al. 2015), other methylation-sensitive techniques have  
423 been developed to take advantage of the basic RADseq methodologies. MethylRAD (Wang et al.  
424 2015) is based on the 2b-RAD methodology (Wang et al. 2012) and employs methylation sensitive  
425 Mrr-like enzymes that, like IIB restriction enzymes, cut upstream and downstream of the recognition  
426 site if it is methylated. Instead, enzymes used for ddRADseq and epiRADseq only cut downstream of  
427 the recognition site. Like epiRADseq, this technique does not provide base-pair resolution of  
428 methylation but provides methylation information by comparing locus read depth across samples to  
429 infer abundance. Given its similarity to 2b-RAD, we suspect that MethylRAD could also be used for  
430 extracting SNPs for genetic analyses as well, although thorough testing should be carried out.  
431 BsRADseq (Trucchi et al. 2016) combines RADseq with bisulfite sequencing, providing a base pair-  
432 resolution of DNA methylation, similarly to RRBS. We also believe this technique could be used for  
433 both genetic and epigenetic analyses, but again we recommend testing to explicitly compare the  
434 genotype datasets.

435 Here, we showed that the recently developed epiRADseq approach for the study of DNA  
436 methylation variation can also be used for generating SNPs for population genetic analyses, using  
437 both reference-based and *de novo* approaches. Sequencing only an epiRADseq library halves the cost  
438 in time, consumables, and sequencing compared to sequencing ddRADseq for SNPs and epiRADseq  
439 for methylation abundance. This combination provides informative biological data for population  
440 genomics and differential methylation, which is a topic of growing interest in molecular ecology and  
441 evolution for its heritable and non-heritable effects (Hu & Barrett, 2017).

442

443

#### 444 Acknowledgements

445 This work was funded by Univ. of Glasgow College of Medical, Veterinary and Life Sciences  
446 doctoral training programme. We thank JL Dimond, SK Gamblewood, and SB Roberts for making  
447 their data public so we could explore it for this paper. We thank Glasgow Polyomics and J Galbraith  
448 for sequencing, M Capstick for support in the laboratory, and A Jacobs for analysis advice and  
449 comments on the draft manuscript. For access to unpublished lake whitefish scaffolds, we thank L  
450 Bernatchez, C Rougeux, S Pavey, E Normandeau, S Lien, and T Nome. We declare no conflict of  
451 interest.

452

#### 453 Data Accessibility

454 Data will be archived and made available in University of Glasgow Enlighten Repository with  
455 manuscript acceptance.

456

#### 457 References

458 Andrews, K. R., Good, J. M., Miller, M. R., Luikart, G., & Hohenlohe, P. A. (2016). Harnessing the  
459 power of RADseq for ecological and evolutionary genomics. *Nature Reviews Genetics*, *17*(2),  
460 81–92. doi:10.1038/nrg.2015.28

- 461 Bolger, A. M., Lohse, M., & Usadel, B. (2014). Trimmomatic: a flexible trimmer for Illumina  
462 sequence data. *Bioinformatics*, 30(15), 2114–2120. doi:10.1093/bioinformatics/btu170
- 463 Bossdorf, O., Richards, C. L., & Pigliucci, M. (2008) Epigenetics for ecologists. *Ecology Letters*.  
464 Wiley/Blackwell (10.1111). doi:10.1111/j.1461-0248.2007.01130.x
- 465 Catchen, J., Hohenlohe, P. A., Bassham, S., Amores, A., & Cresko, W. A. (2013). Stacks: an analysis  
466 tool set for population genomics. *Molecular Ecology*, 22(11), 3124–3140.  
467 doi:10.1111/mec.12354
- 468 Chong, Z., Ruan, J., & Wu, C.-I. (2012). Rainbow: an integrated tool for efficient clustering and  
469 assembling RAD-seq reads. *Bioinformatics*, 28(21), 2732–2737.  
470 doi:10.1093/bioinformatics/bts482
- 471 Davey, J. W., & Blaxter, M. L. (2010). RADSeq: next-generation population genetics. *Briefings in*  
472 *Functional Genomics*, 9(5–6), 416–423. doi:10.1093/bfgp/elq031
- 473 Davey, J. W., Cezard, T., Fuentes-Utrilla, P., Eland, C., Gharbi, K., & Blaxter, M. L. (2013). Special  
474 features of RAD Sequencing data: implications for genotyping. *Molecular Ecology*, 22(11),  
475 3151–3164. doi:10.1111/mec.12084
- 476 Dimond, J. L., Gamblewood, S. K., & Roberts, S. B. (2017). Genetic and epigenetic insight into  
477 morphospecies in a reef coral. *Molecular Ecology*, 26(19), 5031–5042. doi:10.1111/mec.14252
- 478 Dixon, G. B., Bay, L. K., & Matz, M. V. (2014). Bimodal signatures of germline methylation are  
479 linked with gene expression plasticity in the coral *Acropora millepora*. *BMC Genomics*, 15(1),  
480 1109. doi:10.1186/1471-2164-15-1109
- 481 Eaton, D. A. R. (2014). PyRAD: assembly of de novo RADseq loci for phylogenetic analyses.  
482 *Bioinformatics*, 30(13), 1844–1849. doi:10.1093/bioinformatics/btu121

- 483 Ekblom, R., & Galindo, J. (2011). Applications of next generation sequencing in molecular ecology  
484 of non-model organisms. *Heredity*, *107*, 1-15. 10.1038/hdy.2010.152
- 485 Feil, R., & Fraga, M. F. (2012). Epigenetics and the environment: emerging patterns and implications.  
486 *Nature Reviews Genetics*, *13*(2), 97–109. doi:10.1038/nrg3142
- 487 Foust, C. M., Preite, V., Schrey, A. W., Alvarez, M., Robertson, M. H., Verhoeven, K. J. F., &  
488 Richards, C. L. (2016). Genetic and epigenetic differences associated with environmental  
489 gradients in replicate populations of two salt marsh perennials. *Molecular Ecology*, *25*(8), 1639–  
490 1652. doi:10.1111/mec.13522
- 491 Fu, L., Niu, B., Zhu, Z., Wu, S., & Li, W. (2012). CD-HIT: accelerated for clustering the next-  
492 generation sequencing data. *Bioinformatics*, *28*(23), 3150–3152.  
493 doi:10.1093/bioinformatics/bts565
- 494 Gautier, M., Gharbi, K., Cezard, T., Foucaud, J., Kerdelhué, C., Pudlo, P., ... Estoup, A. (2013). The  
495 effect of RAD allele dropout on the estimation of genetic variation within and between  
496 populations. *Molecular Ecology*, *22*(11), 3165–3178. doi:10.1111/mec.12089
- 497 Goudet, J. (2005). HIERFSTAT, a package for R to compute and test hierarchical F-statistics.  
498 *Molecular Ecology Notes*, *5*(1), 184–186. doi:10.1111/j.1471-8286.2004.00828.x
- 499 Gregory, T. R. (2018). Animal Genome Size Database. Retrieved 13 December 2018, from  
500 <http://www.genomesize.com/index.php>
- 501 Gugger, P. F., Fitz-Gibbon, S., Pellegrini, M., & Sork, V. L. (2016). Species-wide patterns of DNA  
502 methylation variation in *Quercus lobata* and their association with climate gradients. *Molecular*  
503 *Ecology*, *25*(8), 1665–1680. doi:10.1111/mec.13563
- 504 Hartl, D. L., & Clark, A. G. (2007). *Principles of population genetics*. Sunderland, MA: Sinauer  
505 Associates.

- 506 Herrera, C. M., Medrano, M., & Bazaga, P. (2017). Comparative epigenetic and genetic spatial  
507 structure of the perennial herb *Helleborus foetidus*: Isolation by environment, isolation by  
508 distance, and functional trait divergence. *American Journal of Botany*, *104*(8), 1195–1204.  
509 doi:10.3732/ajb.1700162
- 510 Hu, J., & Barrett, R. D. H. (2017). Epigenetics in natural animal populations. *Journal of Evolutionary*  
511 *Biology*, *30*(9), 1612–1632. doi:10.1111/jeb.13130
- 512 Jacobs, A., Hughes, M., Robinson, P., Adams, C., & Elmer, K (2018). The Genetic Architecture  
513 Underlying the Evolution of a Rare Piscivorous Life History Form in Brown Trout after  
514 Secondary Contact and Strong Introgression. *Genes*, *9*(6), 280. doi:10.3390/genes9060280
- 515 Jombart, T. (2008). adegenet: a R package for the multivariate analysis of genetic markers.  
516 *Bioinformatics*, *24*(11), 1403–1405. doi:10.1093/bioinformatics/btn129
- 517 Jombart, T., Devillard, S., & Balloux, F. (2010). Discriminant analysis of principal components: a  
518 new method for the analysis of genetically structured populations. *BMC Genetics*, *11*(1), 94.  
519 doi:10.1186/1471-2156-11-94
- 520 Leontiou, C. A., Hadjidaniel, M. D., Mina, P., Antoniou, P., Ioannides, M., & Patsalis, P. C. (2015).  
521 Bisulfite Conversion of DNA: Performance Comparison of Different Kits and Methylation  
522 Quantitation of Epigenetic Biomarkers that Have the Potential to Be Used in Non-Invasive  
523 Prenatal Testing. *PLOS ONE*, *10*(8), e0135058. doi:10.1371/journal.pone.0135058
- 524 Li, H., & Durbin, R. (2009). Fast and accurate short read alignment with Burrows-Wheeler transform.  
525 *Bioinformatics*, *25*(14), 1754–1760. doi:10.1093/bioinformatics/btp324
- 526 Li, H., Handsaker, B., Wysoker, A., Fennell, T., Ruan, J., Homer, N., ... Durbin, R. (2009). The  
527 Sequence Alignment/Map format and SAMtools. *Bioinformatics*, *25*(16), 2078–2079.  
528 doi:10.1093/bioinformatics/btp352

- 529 Liew, Y. J., Zoccola, D., Li, Y., Tambutte, E., Venn, A. A., Michell, C. T., ... Aranda, M. (2018).  
530 Epigenome-associated phenotypic acclimatization to ocean acidification in a reef-building coral.  
531 *Science Advances*, 4(6), eaar8028. doi:10.1126/sciadv.aar8028
- 532 Linck, E., & Battey, C. J. (2019). Minor allele frequency thresholds strongly affect population  
533 structure inference with genomic datasets. *Molecular Ecology Resources*. doi:10.1111/1755-  
534 0998.12995
- 535 Luca, F., Hudson, R. R., Witonsky, D. B., & Di Rienzo, A. (2011). A reduced representation approach  
536 to population genetic analyses and applications to human evolution. *Genome Research*, 21(7),  
537 1087–98. doi:10.1101/gr.119792.110
- 538 Macqueen, D. J., & Johnston, I. A. (2014). A well-constrained estimate for the timing of the salmonid  
539 whole genome duplication reveals major decoupling from species diversification. *Proceedings*  
540 *of the Royal Society B: Biological Sciences*, 281(1778), 20132881–20132881.  
541 doi:10.1098/rspb.2013.2881
- 542 Mastretta-Yanes, A., Arrigo, N., Alvarez, N., Jorgensen, T. H., Piñero, D., & Emerson, B. C. (2015).  
543 Restriction site-associated DNA sequencing, genotyping error estimation and *de novo* assembly  
544 optimization for population genetic inference. *Molecular Ecology Resources*, 15(1), 28–41.  
545 doi:10.1111/1755-0998.12291
- 546 Metzger, D. C. H., & Schulte, P. M. (2016). Epigenomics in marine fishes. *Marine Genomics*, 30, 43–  
547 54. doi:10.1016/J.MARGEN.2016.01.004
- 548 O’Leary, S. J., Puritz, J. B., Willis, S. C., Hollenbeck, C. M., & Portnoy, D. S. (2018). These aren’t  
549 the loci you’e looking for: Principles of effective SNP filtering for molecular ecologists.  
550 *Molecular Ecology*, 27(16), 3193–3206. doi:10.1111/mec.14792

- 551 Pante, E., Abdelkrim, J., Viricel, A., Gey, D., France, S. C., Boisselier, M. C., & Samadi, S. (2015).  
552 Use of RAD sequencing for delimiting species. *Heredity*, *114*(5), 450–459.  
553 doi:10.1038/hdy.2014.105
- 554 Paradis, E., & Schliep, K. (2018). ape 5.0: an environment for modern phylogenetics and evolutionary  
555 analyses in R. *Bioinformatics*. doi:10.1093/bioinformatics/bty633
- 556 Paris, J. R., Stevens, J. R., & Catchen, J. M. (2017). Lost in parameter space: a road map for stacks.  
557 *Methods in Ecology and Evolution*, *8*(10), 1360–1373. doi:10.1111/2041-210X.12775
- 558 Peterson, B. K., Weber, J. N., Kay, E. H., Fisher, H. S., & Hoekstra, H. E. (2012). Double Digest  
559 RADseq: An Inexpensive Method for De Novo SNP Discovery and Genotyping in Model and  
560 Non-Model Species. *PLoS ONE*, *7*(5), e37135. doi:10.1371/journal.pone.0037135
- 561 Puritz, J. B., Matz, M. V., Toonen, R. J., Weber, J. N., Bolnick, D. I., & Bird, C. E. (2014).  
562 Demystifying the RAD fad. *Molecular Ecology*, *23*(24), 5937–5942. doi:10.1111/mec.12965
- 563 Recknagel, H., Jacobs, A., Herzyk, P., & Elmer, K. R. (2015). Double-digest RAD sequencing using  
564 Ion Proton semiconductor platform (ddRADseq-ion) with nonmodel organisms. *Molecular*  
565 *Ecology Resources*, *15*(6), 1316–1329. doi:10.1111/1755-0998.12406
- 566 Richards, C. L., Schrey, A. W., & Pigliucci, M. (2012). Invasion of diverse habitats by few Japanese  
567 knotweed genotypes is correlated with epigenetic differentiation. *Ecology Letters*, *15*(9), 1016–  
568 1025. doi:10.1111/j.1461-0248.2012.01824.x
- 569 Robertson, M., Schrey, A., Shayter, A., Moss, C. J., & Richards, C. (2017). Genetic and epigenetic  
570 variation in *Spartina alterniflora* following the *Deepwater Horizon* oil spill. *Evolutionary*  
571 *Applications*, *10*(8), 792–801. doi:10.1111/eva.12482
- 572 Rowe, H. C., Renaut, S., & Guggisberg, A. (2011). RAD in the realm of next-generation sequencing  
573 technologies. *Molecular Ecology*, *20*(17), 3499–3502. doi:10.1111/j.1365-294X.2011.05197.x

- 574 Schield, D. R., Walsh, M. R., Card, D. C., Andrew, A. L., Adams, R. H., & Castoe, T. A. (2016).  
575 EpiRADseq: scalable analysis of genomewide patterns of methylation using next-generation  
576 sequencing. *Methods in Ecology and Evolution*, 7(1), 60–69. doi:10.1111/2041-210X.12435
- 577 Schrey, A. W., Alvarez, M., Foust, C. M., Kilvitis, H. J., Lee, J. D., Liebl, A. L., ... Robertson, M.  
578 (2013). Ecological Epigenetics: Beyond MS-AFLP. *Integrative and Comparative Biology*,  
579 53(2), 340–350. doi:10.1093/icb/ict012
- 580 Shafer, A. B. A., Peart, C. R., Tusso, S., Maayan, I., Brelsford, A., Wheat, C. W., & Wolf, J. B. W.  
581 (2017). Bioinformatic processing of RAD-seq data dramatically impacts downstream population  
582 genetic inference. *Methods in Ecology and Evolution*, 8(8), 907–917. doi:10.1111/2041-  
583 210X.12700
- 584 Trucchi, E., Mazzarella, A. B., Gilfillan, G. D., Lorenzo, M. T., Schönswetter, P., & Paun, O. (2016).  
585 BsRADseq: screening DNA methylation in natural populations of non-model species. *Molecular*  
586 *Ecology*, 25(8), 1697–1713. doi:10.1111/mec.13550
- 587 Wang, S., Lv, J., Zhang, L., Dou, J., Sun, Y., Li, X., ... Bao, Z. (2015). MethylRAD: a simple and  
588 scalable method for genome-wide DNA methylation profiling using methylation-dependent  
589 restriction enzymes. *Open Biology*, 5(11), 150130. doi:10.1098/rsob.150130
- 590 Wang, S., Meyer, E., McKay, J. K., & Matz, M. V. (2012). 2b-RAD: a simple and flexible method for  
591 genome-wide genotyping. *Nature Methods*, 9(8), 808–810. doi:10.1038/nmeth.2023
- 592 Weir, B. S., & Cockerham, C. C. (1984). Estimating F-Statistics for the Analysis of Population  
593 Structure. *Evolution*, 38(6), 1358–1370.
- 594
- 595



596 **Tables**

597

598 Table 1. Number of samples in the libraries, and number of reads retained (in millions, M) after each  
 599 step. Retained reads is the number after demultiplexing and Trimmomatic. BAM records refers to the  
 600 number of reads retained after mapping to (pseudo)reference draft genome. Catalogue loci are the  
 601 total loci inferred from Stacks, whether variable or not.

602

|                                   | <b>N individuals</b> | <b>Total reads</b><br><b>(millions)</b> | <b>Retained reads</b><br><b>(millions)</b> | <b>Bam records</b><br><b>(millions)</b> | <b>Catalogue</b><br><b>loci</b> |
|-----------------------------------|----------------------|-----------------------------------------|--------------------------------------------|-----------------------------------------|---------------------------------|
| <b>Coral ddRAD</b>                | 30                   | 213                                     | 205                                        | 142                                     | 285,987                         |
| <b>Coral EpiRAD</b>               | 30                   | 156                                     | 149                                        | 102                                     | 164,411                         |
| <b>Whitefish</b><br><b>ddRAD</b>  | 43                   | 524                                     | 118                                        | 40                                      | 355,491                         |
| <b>Whitefish</b><br><b>EpiRAD</b> | 43                   | 554                                     | 227                                        | 120                                     | 321,324                         |

603

604

605

606

607 Table 2. Spearman's correlation between coral and whitefish epiRADseq and ddRADseq estimates of  
608 expected heterozygosity ( $H_e$ ), observed heterozygosity ( $H_o$ ), and nucleotide diversity ( $P_i$ ) for  $-r$  67,  $-r$   
609 75, and  $-r$  100 datasets. Number of sites corresponds to the SNPs shared between epiRADseq and  
610 ddRADseq datasets, for which the correlation was calculated.

611

|                  | <b>Stacks</b>    | <b>Number of</b> | <b><math>H_e</math></b> | <b><math>H_o</math></b> | <b><math>P_i</math></b> |
|------------------|------------------|------------------|-------------------------|-------------------------|-------------------------|
|                  | <b>filtering</b> | <b>sites</b>     |                         |                         |                         |
| <b>Whitefish</b> | $-r$ 67          | 4518             | 0.904                   | 0.885                   | 0.896                   |
|                  | $-r$ 75          | 4294             | 0.911                   | 0.889                   | 0.903                   |
|                  | $-r$ 100         | 2978             | 0.928                   | 0.906                   | 0.919                   |
| <b>Coral</b>     | $-r$ 100         | 676              | 0.988                   | 0.972                   | 0.988                   |

612

613

614

615 **Figures**

616

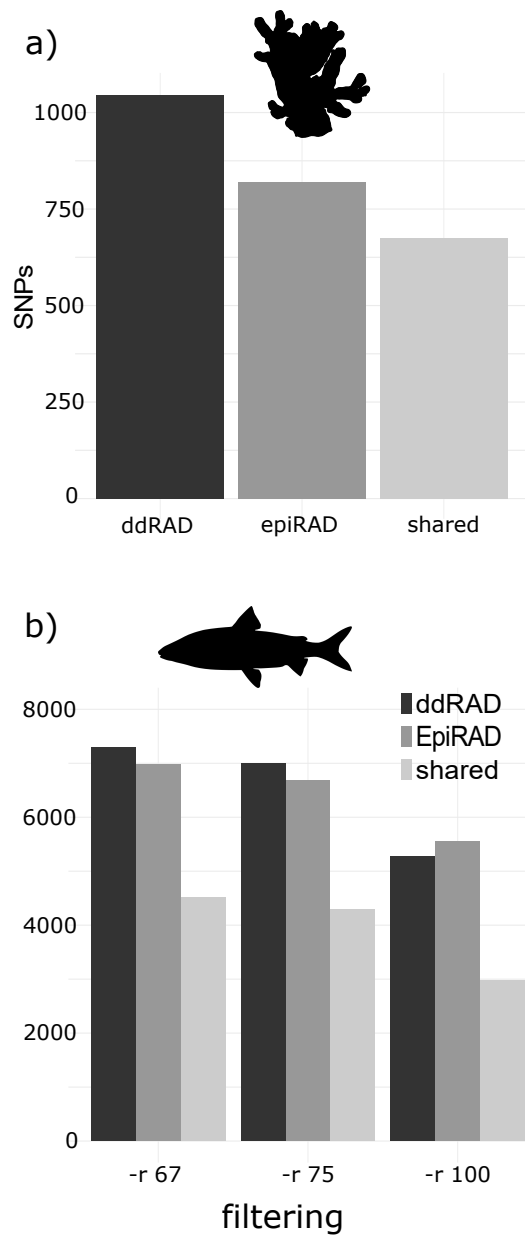

617

618

619 Figure 1. The number of SNPs retained by the ddRADseq and epiRADseq datasets for a) the coral  
620 data and b) whitefish data. Three datasets were created for the whitefish data, differing in the  
621 percentage of individuals that must possess a particular locus for it to be included (*-r* parameter of the  
622 *population* program from the *Stacks* pipeline).

623

624

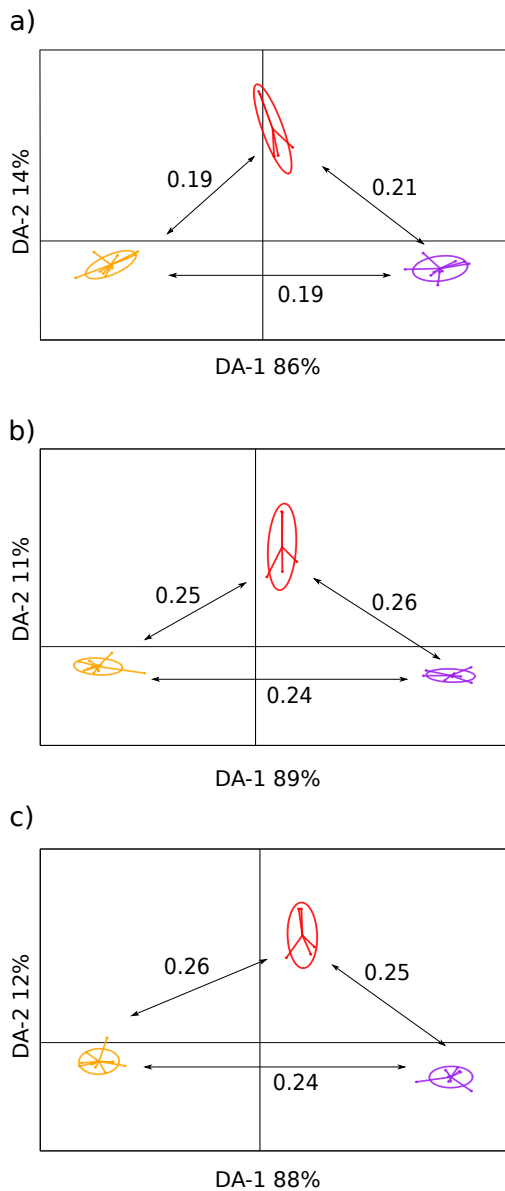

625

626 Figure 2. Results of the coral DAPC analyses of the a) SNPs used by Dimond et al. (2017), b) SNPs  
627 from the re-called ddRADseq dataset, and c) SNPs from the epiRADseq dataset. The analysis was  
628 based on five retained principal components, as suggested by the cross-validation of DAPC. These  
629 PCs were then summarised with two discriminant functions and percent variance captured appears on  
630 the axes. The numbers on arrows are Weir and Cockerham  $F_{st}$  values between the clusters.

631

632

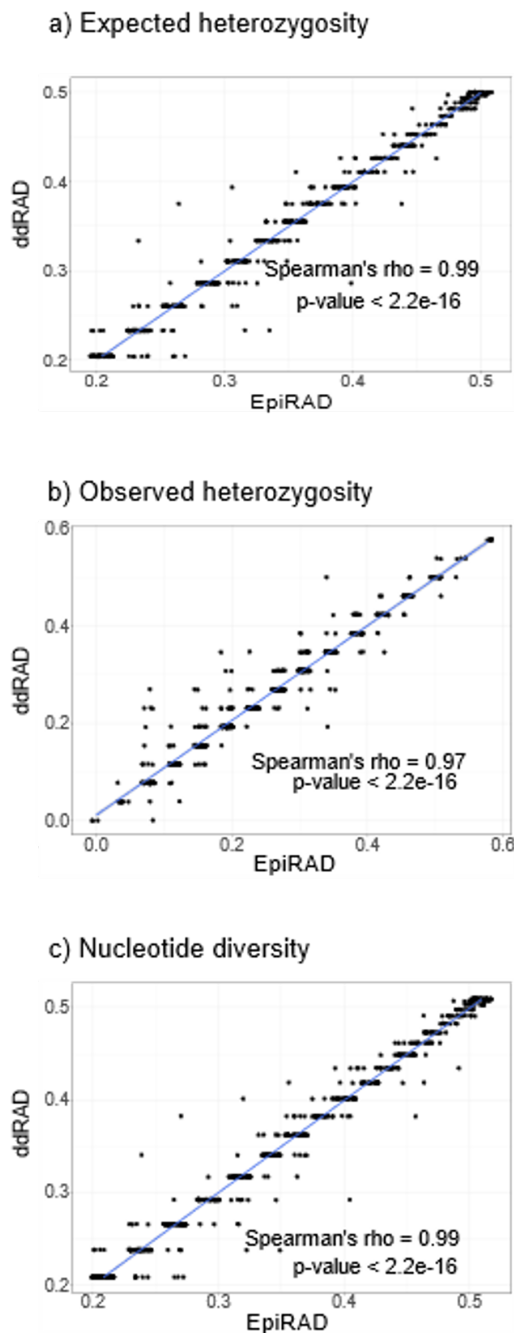

633

634

635 Figure 3. Correlation of a) expected heterozygosity, b) observed heterozygosity, and c) nucleotide  
636 diversity, between ddRADseq (y axis) and epiRADseq (x axis) estimates for the coral data. Each dot  
637 represents a genomic site from the “sumstats.tsv” file of the Stacks pipeline that was shared between  
638 the ddRADseq and the epiRADseq datasets.

639

640

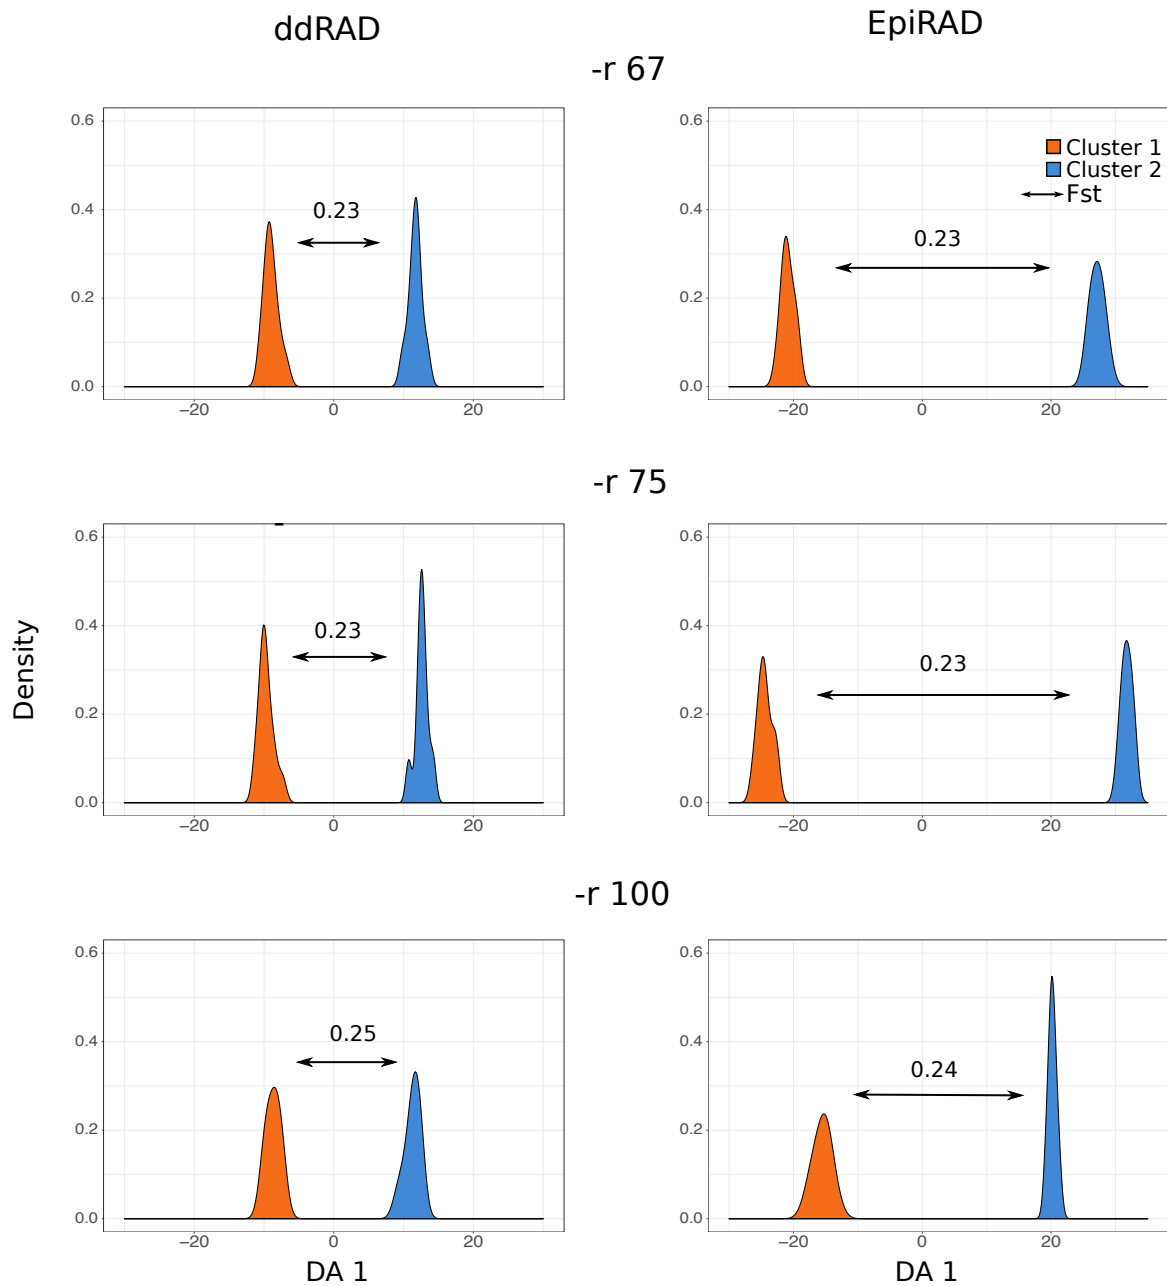

641

642

643 Figure 4. Results of the European whitefish DAPC analyses at three different filtering stringencies (-r

644 67, -r 75, -r 100). The analysis was based on five retained principal components, as suggested by the

645 cross-validation of DAPC. These PCs were then summarised on one discriminant function, as only

646 two genetic clusters are observed. The numbers above arrows represent Weir and Cockerham Fst

647 values between the two identified clusters.
